# Supplementary material for: ZZ-dependent regulation of p62/SQSTM1 in autophagy
Source: PubMed Central journal article supplement (PMC6197226; doi:10.1038/s41467-018-06878-8), 2018-10-22
Supplement: 41467_2018_6878_MOESM1_ESM.pdf [file 41467_2018_6878_MOESM1_ESM.pdf]

## **Supplementary Information**

### **ZZ-Dependent regulation of p62/SQSTM1 in autophagy**

Yi Zhang, Su Ran Mun, et al.,

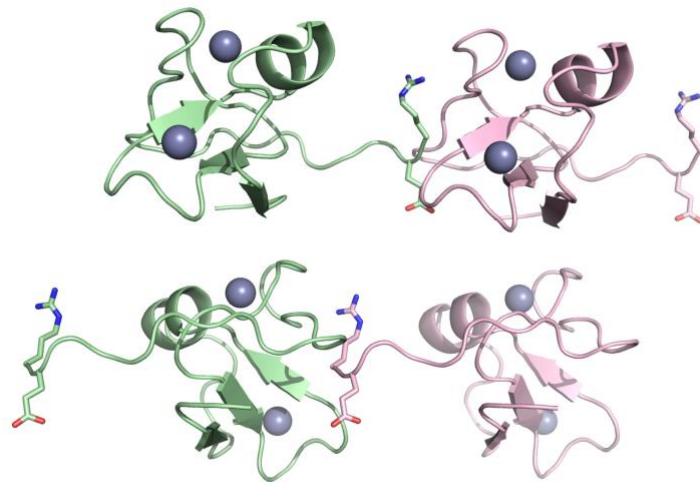

**Supplementary Figure 1.** The crystal structure of the RELGS-ZZ construct.

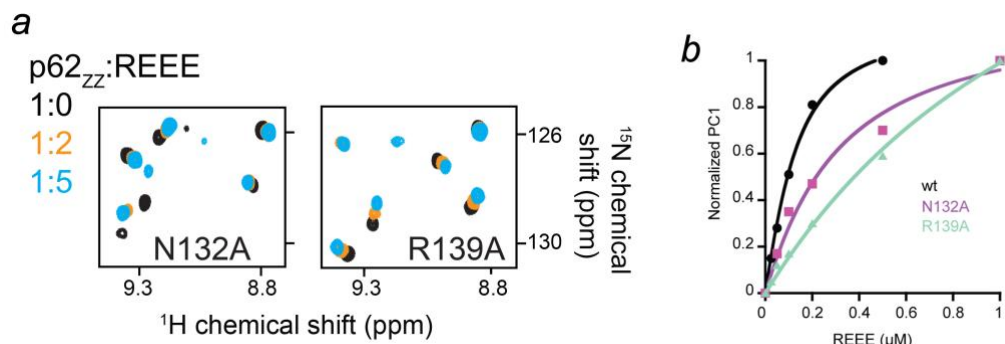

**Supplementary Figure 2.** (a) Superimposed  $^1\text{H}$ ,  $^{15}\text{N}$  HSQC spectra of the indicated mutants of p62<sub>ZZ</sub> (115-190) collected upon titration with the REEE peptide. Spectra are color coded according to the protein:peptide molar ratio. (b) Binding isotherms for the interaction of WT p62<sub>ZZ</sub> (115-190) and N132A and R139A mutants with the REEE peptide obtained using NMR principal component analysis (PCA) implemented with TREND software<sup>1</sup>.

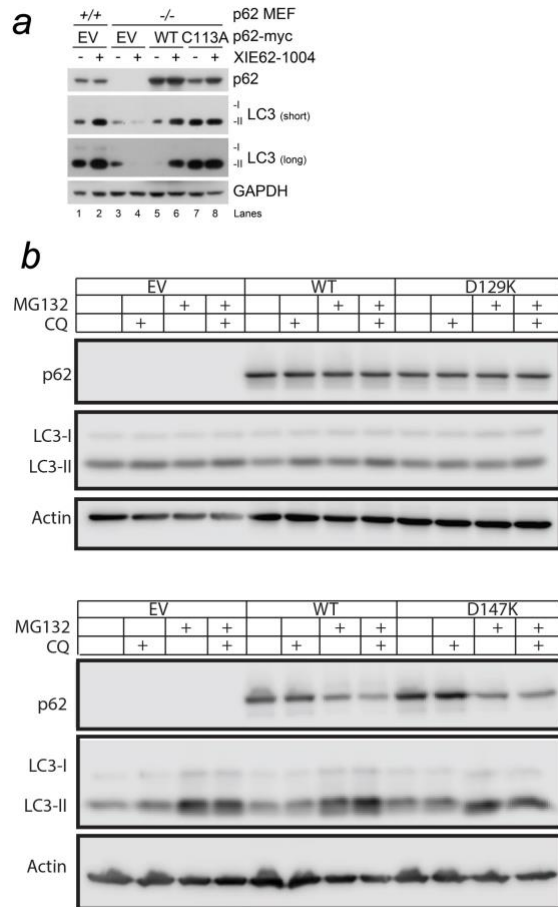

**Supplementary Figure 3.** (a) p62 aggregation via Cys113 is also essential for induction of autophagy with XIE62-1004. Treatment of p62 +/+ cells with XIE62-1004 induced LC3-II lipidation, whereas p62 -/- cells were non-responsive. As expected, transient expression of recombinant p62-myc in p62 -/- MEFs rescued their ability to induce LC3-II lipidation upon XIE62-1004 treatment. Importantly, p62 C113A mutant failed to induce autophagy upon XIE62-1004 treatment. Intriguingly, the mere expression of the p62 C113A mutant was sufficient to increase the level of LC3-II. (b) Western blot for LC3 I/II, p62 and  $\beta$ -Actin on whole cell lysates harvested from p62-/- MEFs with stable expression of an empty vector, WT p62, D129K p62 (top) or D147K (bottom) p62 after treatment with MG132 (500nM) or CQ for 24hrs.

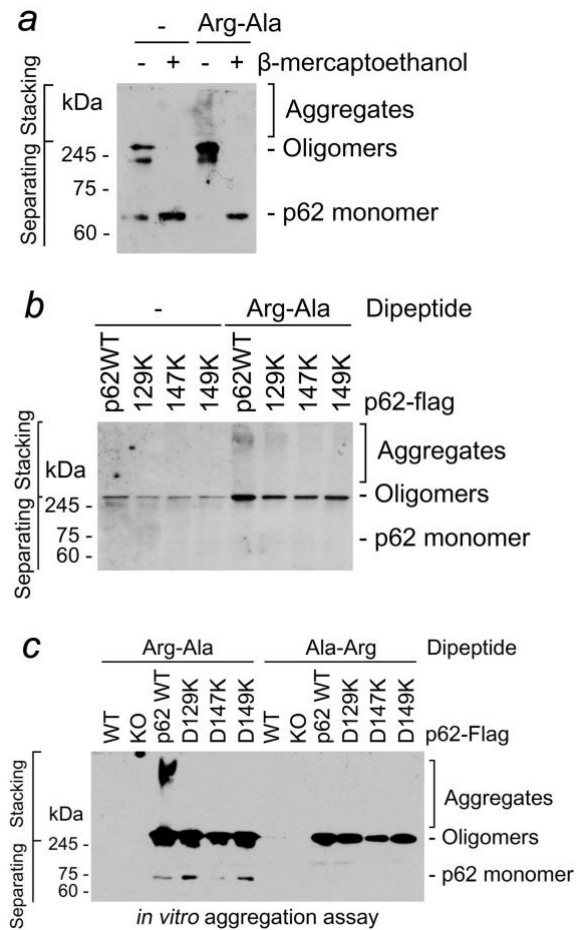

**Supplementary Figure 4.** (a) *In vitro* aggregation assays of wild-type p62 stably expressed in p62 f/f MEFs with or without β-mercaptoethanol. (b) *In vitro* aggregation assays of wild-type or mutated p62 stably expressed in p62 f/f MEFs treated with or without Arg-Ala. (c) *In vitro* aggregation assays of wild-type or mutated p62 stably expressed in p62 f/f MEFs treated with Arg-Ala or Ala-Arg.

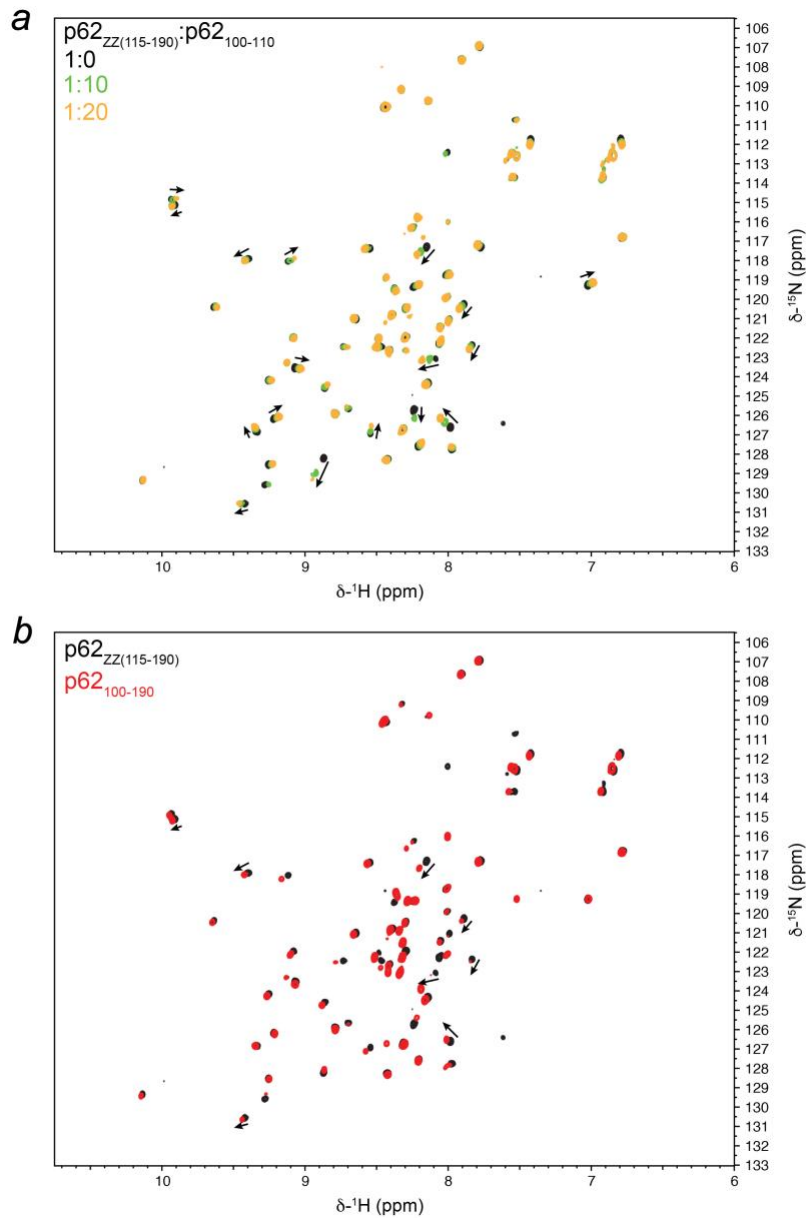

**Supplementary Figure 5.** (a) Superimposed  $^1\text{H},^{15}\text{N}$  HSQC spectra of p62<sub>ZZ(115-190)</sub> collected upon titration with the p62<sub>ZZ(100-110)</sub> peptide. Spectra are color coded according to the protein:peptide molar ratio. (b) Superimposed  $^1\text{H},^{15}\text{N}$  HSQC spectra of p62<sub>ZZ(115-190)</sub> and p62<sub>RL-ZZ(100-190)</sub> in apo-states.

## Primer Sequences

### p62 D129K

5'-ctgcaaaggctgcaatgggcctgtgtaggaac-3'  
5'-aacatggtgcacccaatgtgatctgcaaaggc-3'

### p62 D147K

5'-gccccaaaatacgacttgtgtagcgtctgagggg-3'  
5'-cccgctacaagtcagcgtctgccccaaaatac-3'

### p62 D149K

5'-ctacaaattgtgtagcgtctgaggggaaagggc-3'  
5'-cccgctacaagtcagcgtctgccagactacaaattg-3'

### p62 115-190

5'-ccctgggatcccaggaggcgccccgcaacatggtg-3'  
5'-gttctgtccaggggcccctgggatcccaggaggcg-3'

### p62 120-190

5'-ccctgggatccaacatggtgcacccaatgtgatctgcgatggc-3'  
5'-gttctgtccaggggcccctgggatccaacatggtgcacc-3'

### NdeI\_pCIOX\_F

5'-AGATATACATATGGGCAGCAG-3'

### p62\_171\_EcoRI\_R

5'-GAGCTCGAATTCttaGGGGCTGGGGAATGCG-3'

### p62\_190\_EcoRI\_R

5'-GAGCTCGAATTCttaGTGTTTCACCTTCCGGAG-3'

### Sumo\_LGS\_p62\_120

5'-GAGAACAGATTGGTGGTctgggtagcAACATGGTGCACCCC-3'  
5'-GGGGTGCACCATGTTgctaccagACCACCAATCTGTTCTC-3'

### Sumo\_RELGS\_p62\_120

5'-GAGAACAGATTGGTGGTcgtgagctgggtagcAACATGGTGCACCCC-3'  
5'-GGGGTGCACCATGTTgctaccagctcacgACCACCAATCTGTTCTC-3'

**Supplementary Figure 6.** List of primers.

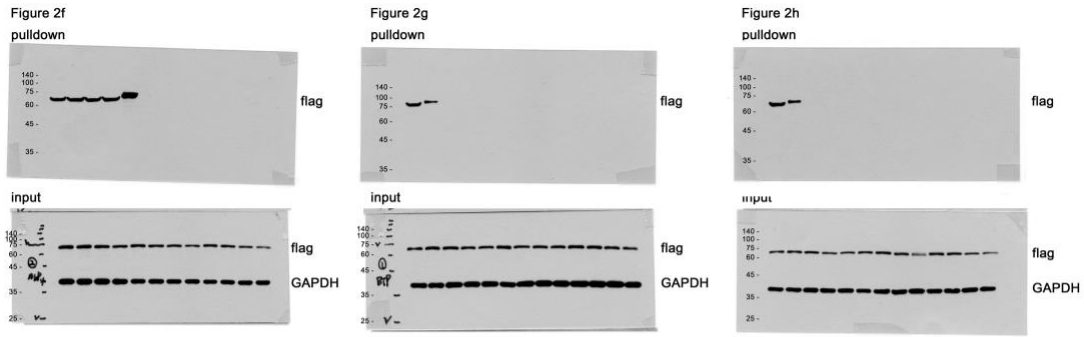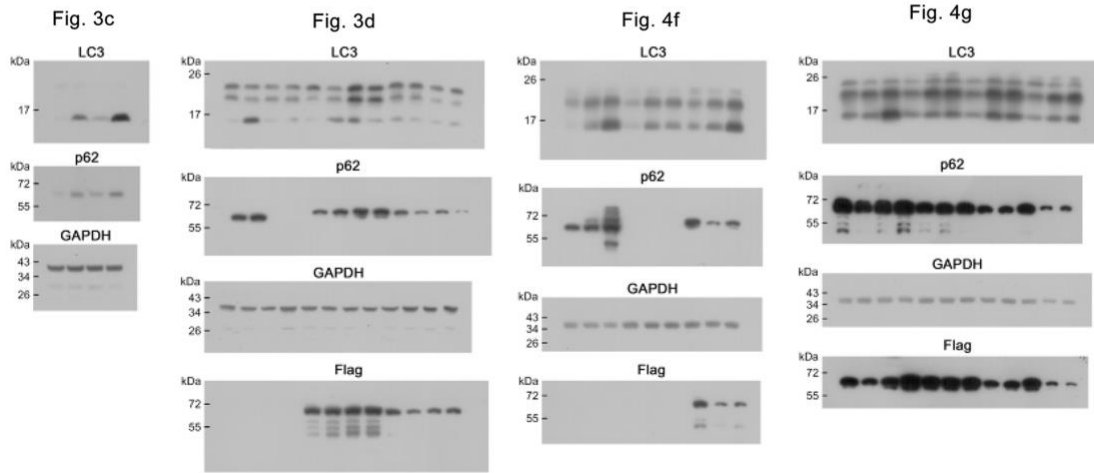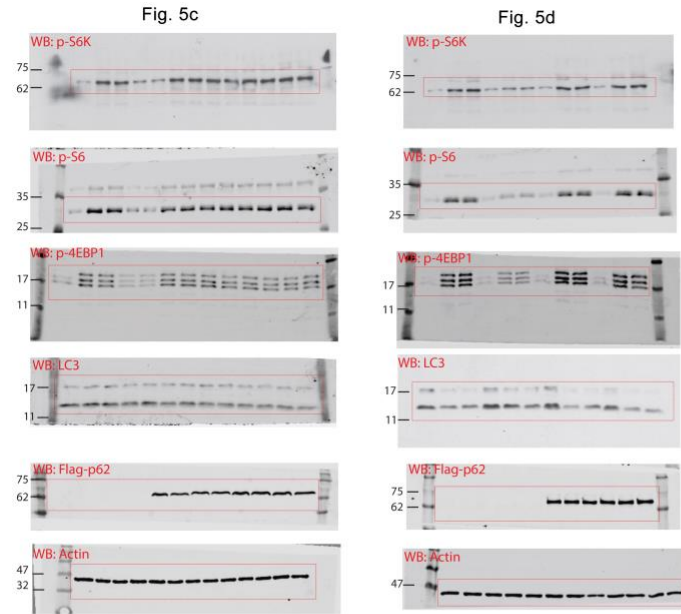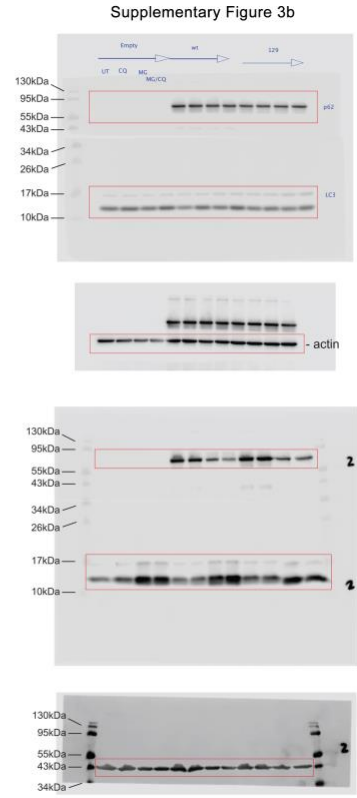

Supplementary Figure 7. Uncropped Western blots.



**Supplementary Table 1.** Data collection and refinement statistics for the p62<sub>ZZ</sub>

complexes

|                                    | RE-ZZ                | ZZ/Arginine                 |
|------------------------------------|----------------------|-----------------------------|
| <b>Data collection</b>             |                      |                             |
| Wavelength                         | 1.5418 Å             | 1.2782 Å                    |
| Space group                        | P1                   | C2                          |
| Resolution (Å)                     | 25.31–1.90           | 50.00-1.41                  |
| Cell dimensions (Å)                |                      |                             |
|                                    | a=26.99              | a=44.97                     |
|                                    | b=27.86              | b=32.27                     |
|                                    | c=38.99              | c=34.94                     |
|                                    | $\alpha=90.06^\circ$ | $\alpha=\gamma=90.00^\circ$ |
|                                    | $\beta=90.45^\circ$  | $\beta=122.16^\circ$        |
|                                    | $\gamma=110.3^\circ$ |                             |
| Number of measured reflections     | 51427                | 107631                      |
| Number of unique reflections       | 8404                 | 8142                        |
| Completeness(%)                    | 99.5 (93.1)          | 98.4 (78.4)                 |
| Redundancy                         | 6.1 (3.0)            | 13.2 (9.3)                  |
| I/sigma (I)                        | 27.8 (5.1)           | 83.2 (45.5)                 |
| Rmerge(%)                          | 6.4 (19.9)           | 6.3 (16.5)                  |
| <b>Refinement</b>                  |                      |                             |
| Resolution (Å)                     | 25.31-1.90           | 29.58-1.41                  |
| Number of reflections              | 14195                | 8142                        |
| R-factor (%)                       | 0.1546               | 0.1356                      |
| R-free (%)                         | 0.2123               | 0.1646                      |
| Number of protein atoms            | 888                  | 422                         |
| Number of Arginine                 | -                    | 12                          |
| Number of Zinc                     | 4                    | 2                           |
| Number of 1,4-Dioxane              | -                    | 6                           |
| Number of water molecules          | 133                  | 107                         |
| R.m.s.d. from ideal values         |                      |                             |
| Bond lengths (Å)                   | 0.007                | 0.005                       |
| Bond angles (°)                    | 1.080                | 0.82                        |
| Average B-values (Å <sup>2</sup> ) | 25.8                 | 13.3                        |
| Protein chain A                    | 20.2                 | 9.9                         |
| Protein chain B                    | 19.2                 |                             |
| Water                              | 31.2                 | 26.9                        |
| Zinc                               | 19.3                 | 8.8                         |
| Arginine                           | -                    | 15.4                        |
| 1,4-Dioxane                        | -                    | 12.7                        |
| Ramachandran Plot analysis         |                      |                             |
| Favored                            | 95.6%                | 96.2%                       |
| Allowed                            | 4.4%                 | 3.9%                        |
| Outliers                           | 0%                   | 0%                          |

\* Values in parentheses refer to data in the highest resolution shell. Datasets collected from a single crystal.

**Supplementary References:**

1. Xu, J. & Van Doren, S.R. Tracking Equilibrium and Nonequilibrium Shifts in Data with TREND. *Biophys J* **112**, 224-233 (2017).

**Supplementary Data 1.** List of antibodies.
