# Supplementary material for: ZZ-dependent regulation of p62/SQSTM1 in autophagy
Source: PubMed Central journal article supplement (PMC6197226; doi:10.1038/s41467-018-06878-8), 2018-10-22
Supplement: 41467_2018_6878_MOESM3_ESM.pdf [file 41467_2018_6878_MOESM3_ESM.pdf]

## Description of Additional Supplementary Files

File Name: Supplementary Data 1

Description: List of antibodies.
